# Supplementary material
Source: Elsevier journal article supplement (http://eprints.esc.cam.ac.uk/3740/3.haslightboxThumbnailVersion/mmc1.pdf)

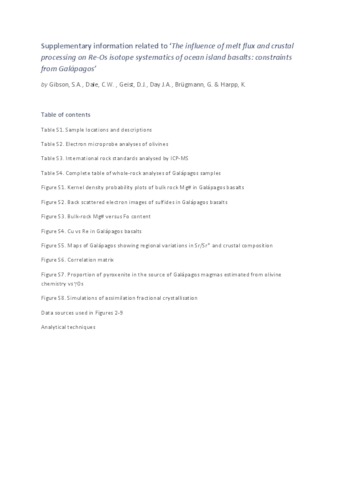

Supplement: mmc1 [file mmc1.pdf]
